# Supplementary material for: The Bicoid Class Homeodomain Factors ceh-36/OTX and unc-30/PITX Cooperate in C. elegans Embryonic Progenitor Cells to Regulate Robust Development
Source: PLoS Genet. 2015 Mar 4;11(3):e1005003. doi: 10.1371/journal.pgen.1005003 (PMC4349592; doi:10.1371/journal.pgen.1005003)
Supplement: S4 Table — (XLSX) [file pgen.1005003.s004.xlsx]

## Sheet: README
	This table shows the mean expression per cell for each reporter
	Expression is calculated using "blot" method for local background correction (Murray et al 2008) and averaged across all time points for that cell
	Blank values are cells not explicitly quantified but can be assumed to be non-expressing in these embryos as we examined expression in late embryos to determine no expressing cells were missed.

## Sheet: data
cell	UNC-30::GFP	CEH-36::GFP	p_ceh-36 2kb	p_ceh-36 5kb	p_ceh-37	FKH-4::GFP
AB
ABa	-112		-79	-609	-161	-222
ABal	-73	-177	-70	-466	-134	-209
ABala	-111	-160	-79.5	-451	-193	-318
ABalaa	-80	-109	-80	-479	-134	770
ABalaaa	-82	-26	-48.5	-386	801	2491
ABalaaaa	-50	-76	-13.5	-252	2003	481
ABalaaaal	-56	-59	-37	-75	1830	-87
ABalaaaala	-6	-93	5	-130	1814	-41
ABalaaaalal				-108	557
ABalaaaalar				-115	763
ABalaaaalp	-28	-88	-10	-125	1558	-65
ABalaaaalpa				-19	877	47
ABalaaaalpp				65	927	-138
ABalaaaar	-53	-25	-36.5	-124	2299	-57
ABalaaaarl	-57	-24	-42	-61	1773	-35
ABalaaaarla				-62	1106	-51
ABalaaaarlp				27	894	-23
ABalaaaarr	-37	-59	-64	-58	1694	-74
ABalaaaarra				-9	837	-51
ABalaaaarrp				-27	811	-15
ABalaaap	-85	-67	-31.5	-265	1114	470
ABalaaapa	-27	-15	-109	-134	1370	-60
ABalaaapal	-4	-2	-69	-89	1661	-36
ABalaaapall				-23	761	-5
ABalaaapalr				-87	993	-39
ABalaaapar	-5	51	-89	-10	1339	-51
ABalaaaparl				-123	1085	145
ABalaaaparr				-7	968	-68
ABalaaapp	-45	-70	-67.5	-143	1323	-57
ABalaaappl		-11	-34.5	-29	1367	-83
ABalaaappll				-48	906	-75
ABalaaapplr				-47	413	-13
ABalaaappr	-57	-59	-60.5	-79	1176	8
ABalaaapprl				18	901	58
ABalaaapprr				-90	1053	33
ABalaap	-119	-187	-56.5	-287	683	2030
ABalaapa	-87	-73	-65	-229	1284	272
ABalaapaa	-47	-56	-21	-138	1207	-6
ABalaapaaa	-114	-93	-136	-88	1411	-31
ABalaapaaal					241	93
ABalaapaaar					662	-174
ABalaapaap	-32	51	47	-38	1437	-61
ABalaapaapa					915	10
ABalaapaapp				-42	708	75
ABalaapap	-16	-54	-54	-148	1497	-117
ABalaapapa	13	10	61	15	924	53
ABalaapapp	-46	-122	-47	-309	1422	-2
ABalaapappa				-647	513	-102
ABalaapappp				-539	902	-37
ABalaapp	-54	-69	-69	-189	1319	165
ABalaappa	-6	-2	-40	-126	1264	-3
ABalaappaa	-21	-19	21.5	57	912	91
ABalaappap	-33	-64	-39	-131	832	-100
ABalaappapa				17	203	193
ABalaappapp				-101	168	-1
ABalaappp	-45	-51	-26.5	-107	899	-88
ABalaapppa	20	15	-35	-90	647	-54
ABalaapppaa				-99	405	1
ABalaapppap				-503	84	-6
ABalaapppp	-45	-78	-30	-103	529	-111
ABalaappppa				-167	1053	-42
ABalaappppaa
ABalaappppap
ABalaappppp				-144	661	-9
ABalap	-94	-102	-50	-504	-121	492
ABalapa	-66	-90	-62.5	-379	49	1983
ABalapaa	-44	-42	-26	-159	468	215
ABalapaaa	-23	-45	-87	-26	490	-45
ABalapaaaa	-8	31	-3.5	-93	378	-64
ABalapaaaaa
ABalapaaaap
ABalapaaap	-53	-32	-123.5	8	277	-114
ABalapaaapa				-50		-42
ABalapaaapp				27		-35
ABalapaap	-7	-44	-37	7	223	-120
ABalapaapa	-49	29	-51.5	-133	367	-74
ABalapaapaa				-406		-110
ABalapaapap				-737		-280
ABalapaapp	-71	12	-40.5	-79	316	-134
ABalapaappa				-55		-126
ABalapaappaa
ABalapaappap
ABalapaappp				-52		-149
ABalapap	-75	-19	-48.5	-272	156	197
ABalapapa	-46	-7	-72.5	-83	158	-104
ABalapapaa	12	-12	5	5	167	-52
ABalapapap	-69	-125	-31.5	-20	132	-87
ABalapapapa				-141		-78
ABalapapapaa
ABalapapapap
ABalapapapp				-27		-67
ABalapapp	-31	-62	-57	-108	165	-99
ABalapappa	-41	-40	-88	-81	341	-121
ABalapappaa				-58		-70
ABalapappaaa
ABalapappaap
ABalapappap				-28		-61
ABalapappp	10	-90	-60	-140	253	-104
ABalapapppa				-121		-55
ABalapapppp				-111		147
ABalapp	-76	-85	-62	-319	59	1373
ABalappa	-80	-47	0	-218	155	189
ABalappaa	-68	-58	-53.5	-49	315	-35
ABalappaaa	17	-86	-122.5	-19	441	153
ABalappaap	-59	-33	-137	-44	190	-103
ABalappaapa				-125
ABalappaapp				30
ABalappap	-66	4	-39	-71	179	-115
ABalappapa	-26	29	-53	-78	333	-83
ABalappapaa				132
ABalappapap				-311
ABalappapp	-42	-46	48	-104	239	-115
ABalappappa				-61		-87
ABalappappp				-78		6
ABalappp	-56	-99	-13.5	-177	115	5
ABalapppa	-42	-62	-75.5	-132	25	-69
ABalapppaa	-83	-49	-105	-44	52	-124
ABalapppaaa				-41		-25
ABalapppaap				-55		-81
ABalapppap	-65	-138	-66	-109	-35	-93
ABalapppapa				-75		-122
ABalapppapaa
ABalapppapap
ABalapppapp				-20		-80
ABalapppp	-55	-30	-48.5	-175	57	-99
ABalappppa	-66	-8	-111.5	-64	136	-119
ABalappppaa				-83		-161
ABalappppaaa
ABalappppaap
ABalappppap				-144		-113
ABalappppp	-31	-2	-47.5	-67	38	-91
ABalapppppa				-134		-22
ABalapppppp				-125		-89
ABalp	-102	-220	-91.5	-398	-205	-271
ABalpa	-107	-216	-102	-374	-190	720
ABalpaa	-64	-140	-66.5	-399	-154	2573
ABalpaaa	-72	-61	-33	-178	-443	439
ABalpaaaa	-59	-88	-52.5	-74	-140	-61
ABalpaaaaa	-12	-101	-59	-66	-193	-79
ABalpaaaaaa		-70		-121		-54
ABalpaaaaap		-30		161		-16
ABalpaaaap	-32	-176	-34.5	-198	-6	-45
ABalpaaaapa		-7		-438		23
ABalpaaaapp		-106		-65		-65
ABalpaaap	-60	-123	-166.5	-2	-170	-109
ABalpaaapa	-85	138	-215.5	-283	-74	-102
ABalpaaapaa		332		-305		-67
ABalpaaapap		204		-555		-36
ABalpaaapp	-53	279	-306.5	-99	-47	-62
ABalpaaappa		1156		-485		-105
ABalpaaappp		367		291		-134
ABalpaap	-74	-166	-72.5	-276	-165	554
ABalpaapa	-50	-133	-65.5	-193	-277	-211
ABalpaapaa	-27	206	8.5	334	-262	-125
ABalpaapaaa		189		2071		-56
ABalpaapaap		251		1616		-178
ABalpaapap	-51	27	-125.5	-24	-216	-100
ABalpaapapa		371		1074		-181
ABalpaapapp		342		859		-150
ABalpaapp	-55	-118	-78.5	-106	-189	-124
ABalpaappa	-23	-83	-3.5	30	-336	-45
ABalpaappaa		-23		-121		-143
ABalpaappap		-90				-110
ABalpaappp	-26	-120	-131.5	-73	-92	-65
ABalpaapppa		-46		-39		-91
ABalpaapppp		-85		-125		-23
ABalpap	-87	-270	-53.5	-191	-100	2422
ABalpapa	-93	-139	-54	-225	-180	465
ABalpapaa	-32	-142	-135	-132	-71	-67
ABalpapaaa	-19	-117	-86	-15	-45	-61
ABalpapaaaa		-84		-137		-19
ABalpapaaap		-147		-292		-53
ABalpapaap	-20	-178	-62.5	-147	-125	-37
ABalpapaapa		-58		-228		-82
ABalpapaapp		216		667		-127
ABalpapap	-61	-146	-248.5	-36	-77	-112
ABalpapapa	-95	1706	-142.5	583	-30	-87
ABalpapapaa		1767		5040		-75
ABalpapapap		2244		3136		-70
ABalpapapapa
ABalpapapapp
ABalpapapp	-65	2018	-110.5	1109	-120	-101
ABalpapappa		3152		3381		17
ABalpapappp		3667		3137		-59
ABalpapp	-125	-152	-44.5	-195	-95	351
ABalpappa	-80	256	657.5	210	-70	-135
ABalpappaa	-4	879	1131.5	5081	-146	-74
ABalpappaaa		123		16553		13
ABalpappaap		152		9447		-110
ABalpappaapa
ABalpappaapp
ABalpappap	-81	914	1202	2617	-123	-74
ABalpappapa		2649		8490		-27
ABalpappapp		2390		5147		-11
ABalpappp	-73	161	574	167	-95	-134
ABalpapppa	-19	2489	898.5	8012	-82	-47
ABalpapppaa		1900		15345		-120
ABalpapppap		1779		18316		-170
ABalpapppp	-68	2677	1085.5	2342	-128	-98
ABalpappppa		4367		8329		-45
ABalpappppp		3933		6880		-97
ABalpp	-65	-171	-94.5	-491	-102	427
ABalppa	-42	-127	-75	-369	-115	1648
ABalppaa	-63	-94	-38.5	-157	-71	390
ABalppaaa	-31	-54	-24	-4	-300	-76
ABalppaaaa	-18	93	3	169	-51	-150
ABalppaaap	-95	9	-15	-3	-245	-103
ABalppaaapa				-57
ABalppaaapp				-94
ABalppaap	-14	-40	-49.5	-57	-90	-147
ABalppaapa	7	37	-14.5	118	-220	-54
ABalppaapp	-1	-93	-17.5	-149	-178	-84
ABalppaappa				-284
ABalppaappp				-171
ABalppap	-86	-158	-48.5	-300	-108	283
ABalppapa	-64	-170	-54.5	-138	-145	-102
ABalppapaa	21	-73	-4	-79	-167	-96
ABalppapaaa				-105
ABalppapaap				-54
ABalppapap	49	-121	-336	-48	-79	-152
ABalppapapa				-150
ABalppapapp				-285
ABalppapp	-77	-189	-132	-187	-63	-131
ABalppappa	-4	-96	-16.5	-72	-145	-108
ABalppappaa				-136
ABalppappap				-101
ABalppappp	-76	-236	-174.5	-220	-21	-183
ABalppapppa				-371
ABalppapppaa
ABalppapppap
ABalppapppp				-317
ABalppp	-69	-207	-79.5	-303	-143	1689
ABalpppa	-95	-129	-82	-241	-246	249
ABalpppaa	-17	-29	-37.5	-59	-229	-114
ABalpppaaa	2	-21	-30.5	-147	-83	-82
ABalpppaaaa				-63	-1249
ABalpppaaap				-169	-1612
ABalpppaap	21	-4	50.5	17	-93	-53
ABalpppaapd				-200	-524
ABalpppaapv				-74	-88
ABalpppap	-71	-80	-23.5	-249	-71	-76
ABalpppapa	20	-13	-25	-204	-142	-36
ABalpppapad				-17	3220
ABalpppapav				-605	2383
ABalpppapp	-60	-80	50.5	-130	-135	-88
ABalpppappa				15	-272
ABalpppappp				-157	-916
ABalpppapppa
ABalpppapppp
ABalpppp	-75	-150	-62.5	-267	-93	187
ABalppppa	-60	-72	-38	-144	-45	-90
ABalppppaa	-75	-73	13.5	-64	791	-54
ABalppppaad				-127	6842
ABalppppaav				289	6376
ABalppppap	-46	-82	-91.5	10	724	-74
ABalppppapa				-77	5166
ABalppppapaa
ABalppppapap
ABalppppapp				67	5299
ABalppppp	-51	-143	-45	-224	-23	-67
ABalpppppa	-35	-66	-32	237	502	-80
ABalpppppaa				-264	6067
ABalpppppap				-1	6024
ABalpppppp	-63	-153	-50.5	-232	-45	-96
ABalppppppa				93	3325
ABalppppppaa
ABalppppppap
ABalppppppp				-172	2202
ABalpppppppa					3187
ABalpppppppp					2529
ABar	-61	-85	-74	-383	-101	-179
ABara	-133	-207	-65.5	-279	-241	-162
ABaraa	-103	-185	-70.5	-282	-173	648
ABaraaa	-114	-134	-29	-313	-143	2654
ABaraaaa	-73	-86	-55.5	-184	-198	1123
ABaraaaaa	-39	-81	-14	-104	-245	8
ABaraaaaaa	72	-71	-69	-137	-396	-97
ABaraaaaaaa		-2		70		-22
ABaraaaaaap		-84		-289		97
ABaraaaaap	38	-93	8.5	-134	-2	-71
ABaraaaaapa		-60		-76		-85
ABaraaaaapp		80		-126		-1
ABaraaaap	-39	-126	-68.5	-50	-85	49
ABaraaaapa	-96	-75	-67.5	-78	-196	-50
ABaraaaapaa		-138		-29		16
ABaraaaapap		-48		-179		-30
ABaraaaapp	-113	147	-68.5	34	-111	-34
ABaraaap	-71	-97	-55.5	-319	-224	954
ABaraaapa	-65	-56	-62.5	-200	-101	-29
ABaraaapaa	-65	263	16.5	-96	-3	-73
ABaraaapaaa		409		-88		-127
ABaraaapaap		397		-209		-59
ABaraaapap	-58	340	-84	-130	-151	-67
ABaraaapapa		402		-313		-62
ABaraaapapp		326		-117		-70
ABaraaapp	-80	-50	-29	-28	-68	-41
ABaraaappa	-90	-55	-21	-13	-100	-95
ABaraaappaa		-43		-44		-377
ABaraaappap		-55		-87		479
ABaraaappp	-59	-106	30	-65	15	-70
ABaraaapppa		-70		-66		71
ABaraaapppp		-83		-95		-22
ABaraap	-83	-188	-113	-190	-197	2694
ABaraapa	-108	-181	-37	-173	-43	1067
ABaraapaa	-75	-145	-60	-100	-213	-77
ABaraapaaa	-43	-141	-35.5	-49	-188	-87
ABaraapaaaa		-29		5		-97
ABaraapaaap		-40		-162		-125
ABaraapaap	-70	111	-257.5	-128	-133	-101
ABaraapaapa		1685		-63		-114
ABaraapaapp		2071		-210		-87
ABaraapap	-48	-170	-169	-92	-134	-25
ABaraapapa	-18	1121	-137.5	-189	-16	-126
ABaraapapaa		1429		12		-82
ABaraapapaad
ABaraapapaav
ABaraapapap		1058		-186		-85
ABaraapapp	-75	1045	-379	-323	-42	-89
ABaraapappa		1245		-317		-114
ABaraapappp		929		-461		-136
ABaraapp	-115	-195	-100.5	-126	-98	1231
ABaraappa	-24	440	-64.5	-123	-101	-75
ABaraappaa	-55	837	-68	-72	-102	-92
ABaraappaaa		464		-54		-172
ABaraappaap		395		-44		9
ABaraappap	-83	985	-97	-80	-52	-78
ABaraappapa		1463		-58		-77
ABaraappapp		1935		-87		-27
ABaraappp	-65	590	-420.5	-70	-41	-4
ABaraapppa	-46	3086	-241.5	-162	-108	-54
ABaraapppaa		2132		-98		-51
ABaraapppaad
ABaraapppaav
ABaraapppap		2285		258		-80
ABaraapppp	-50	2720	-244	-278	-24	-67
ABaraappppa		1869		-579		-132
ABaraappppp		1430		-350		-11
ABarap	-130	-162	-50	-221	-192	630
ABarapa	-117	-58	-71.5	-335	-129	2512
ABarapaa	-82	-85	-37	-163	-71	796
ABarapaaa	-79	-134	-169	-114	-11	-86
ABarapaaaa	-25	-112	-118.5	-103	22	-100
ABarapaaaaa		-39		-84
ABarapaaaap		-134		-51
ABarapaaap	-11	-230	-309.5	-155	-12	-71
ABarapaaapa		-27		-260
ABarapaaapp		35		-339
ABarapaap	-97	-185	-123	-105	-55	-48
ABarapaapa	-79	1403	-79.5	-124	-60	-28
ABarapaapaa		1244		-199
ABarapaapap		735		-346
ABarapaapp	-64	1336	-469.5	-162		-56
ABarapaappa		2242		-357		-61
ABarapaappp		1189		-223		-103
ABarapap	-95	-64	-85	-100	-160	654
ABarapapa	-82	45	-66.5	-70	-92	-118
ABarapapaa	-117	403	-115	72	-216	-52
ABarapapaaa		266		648		-41
ABarapapaap		22		258		-29
ABarapapaapa
ABarapapaapp
ABarapapap	-61	726	-50.5	-45	-121	-76
ABarapapapa		3370		-207		-92
ABarapapapp		3344		-612		-121
ABarapapp	-86	114	-208.5	-53	-134	-46
ABarapappa	-35	1398	-214	112	-63	-83
ABarapappaa		1238		416
ABarapappap		939		447
ABarapappp	-82	1325	-285	-227	-175	-92
ABarapapppa		2015		-220		-78
ABarapapppp		2123		-294		-124
ABarapp	-129	-183	-89.5	-133	-193	2408
ABarappa	-35	-62	-11.5	-107	-89	608
ABarappaa	-53	-138	-71.5	-31	-77	-97
ABarappaaa	-41	-216	-133.5	-92	50	-49
ABarappaaaa		-70		-167		-50
ABarappaaap		-71		17		-212
ABarappaap	-93	-345	-100	-164	136	-117
ABarappaapa		-122		-123		-11
ABarappaapp		-291		-524		-58
ABarappap	-100	-144	-92.5	-98	-112	-42
ABarappapa	-18	989	-34	43	-44	-88
ABarappapaa		1238		2010		-68
ABarappapap		1533		618		-116
ABarappapapa
ABarappapapp
ABarappapp	-32	1579	-66	114	-9	-108
ABarappappa		3861		1398		-54
ABarappappp		3441		489		-86
ABarappp	-121	-89	-38	-134	-157	785
ABarapppa	-23	-154	-33	-74	-38	-100
ABarapppaa	-44	-149	11	-128	-92	-47
ABarapppaaa		-99		-114		-52
ABarapppaap		-81		-79		-26
ABarapppap	-70	-174	-30	-81	-150	-42
ABarapppapa		-176		-32		-47
ABarapppapp		-95		-369		-46
ABarapppp	-77	-160	-23.5	-105	-102	-75
ABarappppa	-69	-111	5	-150	-52	-73
ABarappppaa		-68		-200		-88
ABarappppap		-79		-329		-36
ABarappppp	-139	-161	-18.5	-235	-148	-62
ABarapppppa		-130		-341		13
ABarapppppaa
ABarapppppap
ABarapppppp		-155		-320		-57
ABarp	-53	-91	-105	-443	-95	-179
ABarpa	-71	-74	-67.5	-453	-49	566
ABarpaa	-82	-60	-53	-408	339	2664
ABarpaaa	-64	-31	-30	-298	1715	600
ABarpaaaa	-11	-41	-55	-92	1392	-32
ABarpaaaaa		-17	-66.5	18	1492	-61
ABarpaaaaal				-23	926
ABarpaaaaar				15	1293
ABarpaaaap	-54	-25	-46	-74	1012	-57
ABarpaaaapa				-91	537
ABarpaaaapp				53	334
ABarpaaap	-59	-28	-39	-85	837	-9
ABarpaaapa	-22	5	-159.5	-60	1072	-51
ABarpaaapaa				56	1099	310
ABarpaaapap				-44	599	123
ABarpaaapp	-70	-18	-96.5	-15	1134	8
ABarpaap	-37	-64	-41.5	-309	684	278
ABarpaapa	-24	4	-42.5	-158	803	-21
ABarpaapaa	10	-72	-77.5	-156	339	-30
ABarpaapap	-64	-35	-68	-175	651	-56
ABarpaapp	-14	-51	-49.5	-135	534	-49
ABarpaappa	-54	-23	-12.5	-121	564	-50
ABarpaappp	-24	-67	-16.5	-154	477	-19
ABarpap	-77	-92	-39.5	-303	275	1514
ABarpapa	-50	-78	-15.5	-192	836	517
ABarpapaa	-53	-41	-29.5	-207	808	-73
ABarpapaaa	-42	-26	-20	-100	641	-79
ABarpapaaaa				-28		-33
ABarpapaaap				-37		78
ABarpapaap	9	-24	-37.5	-84	399	-42
ABarpapaapa				-21		-78
ABarpapaapp				-95		-110
ABarpapaappa
ABarpapaappp
ABarpapap	-31	-36	-30	-145	420	-26
ABarpapapa	-46	-39	-76	-92	265	-47
ABarpapapp	-37	55	-16	-112	215	-50
ABarpapp	-53	-51	-52	-202	540	207
ABarpappa	-5	-66	-17	-157	517	-51
ABarpappaa	107	-56	17	-29	347	-43
ABarpappap	53	-24	-54	-45	397	-61
ABarpappp	-8	-90	-24.5	-109	409	-65
ABarpapppa	-70	-39	-53.5	-47	503	-90
ABarpapppp	-69	-81	-83	-81	320	-15
ABarpp	-96	-58	-60	-484	-51	451
ABarppa	-50	-83	-56	-355	6	905
ABarppaa	-32	-37	-10	-197	150	82
ABarppaaa	-30	-50	-55	-150	8	-25
ABarppaaaa	11	-166	71.5	-126	26	-46
ABarppaaap	32	-4	27.5	-157	22	-52
ABarppaap	-43	-54	-13	-164	102	-51
ABarppaapa	-32	-50	-38	-166	-25	-31
ABarppaapp	-47	4	-16	-10	65	-68
ABarppaappa
ABarppaappp
ABarppap	-22	-13	-78.5	-240	129	49
ABarppapa	-54	-81	-28	-151	128	-60
ABarppapaa	-63	79	89.5	-146	186	-33
ABarppapap	-24	-87	-20.5	-94	211	-75
ABarppapp	-37	-52	-43.5	-81	208	-59
ABarppappa	-12	-39	-212	-61	287	-70
ABarppappp	-35	-123	34.5	-119	440	-117
ABarppp	-63	-42	-56.5	-318	90	947
ABarpppa	-74	-41	-35.5	-235	121	107
ABarpppaa	-23	5	-14	-132	59	-35
ABarpppaaa	-15	-4	18	-123	154	-68
ABarpppaap	-49	-64	-4	-127	105	-49
ABarpppap	-37	-71	-72	-112	139	-55
ABarpppapa	-14	-167	-38	-210	39	-42
ABarpppapp	-43	-47	-30	-62	286	-57
ABarpppappa
ABarpppappp
ABarpppp	-56	-71	-54.5	-300	167	104
ABarppppa	-28	-59	-31.5	-115	271	-42
ABarppppaa	-12	-96	55	-77	667	-26
ABarppppap	30	-77	-21.5	-68	820	-73
ABarppppp	-20	-32	-59	-168	195	-72
ABarpppppa	-27	-73	-93	-63	286	-100
ABarpppppp	-33	-42	-59.5	-124	525	-67
ABp	-89		-49.5	-578	-116	-210
ABpl	-70	-248	-62	-497	-43	-127
ABpla	-19	-38	-69	-431	-38	-94
ABplaa	-60	-105	-70.5	-446	-49	248
ABplaaa	-47	-66	-60.5	-355	-50	2041
ABplaaaa	-15	-46	-63	-57	-95	847
ABplaaaaa	-35	-8	-24	73	-139	-35
ABplaaaaaa	-37	-12	-5	16	48	-32
ABplaaaaaaa				182		79
ABplaaaaaap				92		-132
ABplaaaaap	-7	-10	-102	81	-252	-32
ABplaaaaapa				296		-8
ABplaaaaapp				-31		-126
ABplaaaaappa
ABplaaaaappp
ABplaaaap	-42	-17	-18	47	-61	-50
ABplaaaapa	-19	18	29.5	42	-439	-47
ABplaaaapp	-35	-69	46.5	67	-54	-50
ABplaaap	-56	-29	-41.5	-177	-107	428
ABplaaapa	-14	-27	-51.5	-44	-136	7
ABplaaapaa	-90	33	44.5	98	-174	-36
ABplaaapap	16	-22	-91.5	13	-117	-48
ABplaaapp	-30	-64	-52.5	53	-100	-26
ABplaaappa	-43	-101	-48	122	-149	-79
ABplaaappp	-24	-17	-26.5	-27	-101	-81
ABplaap	-66	-114	-46	-373	-78	1026
ABplaapa	-49	-55	-67.5	-144	-55	530
ABplaapaa	-9	-21	-22	36	-98	-75
ABplaapaaa	-37	-32	3	123	-34	-70
ABplaapaaaa	-94			119		-100
ABplaapaaap	5			149		-52
ABplaapaap	-71	24	-28.5	110	-64	-92
ABplaapaapa	-23			154		7
ABplaapaapp	-42			-86		-105
ABplaapap	-24	-58	-47	37	20	-52
ABplaapapa	320	5	5.5	54	64	-66
ABplaapapaa	367			67		-113
ABplaapapap	350			40		-124
ABplaapapp	238	-110	6.5	66	-20	-104
ABplaapappa	248			114		-73
ABplaapappp	298			-13		-68
ABplaapapppa
ABplaapapppp
ABplaapp	-30	-107	-69.5	-196	-56	266
ABplaappa	-8	-40	9	-26	-37	-58
ABplaappaa	-23	-58	39	-191	-61	-44
ABplaappap	7	-102	-6	-355	-40	-92
ABplaappp	-56	-122	-29.5	-92		-126
ABplaapppa	-36	-5	-14	-96	-88	-101
ABplaapppp	-15	-64	1	-113	-110	-96
ABplap	-34	-31	-81.5	-406	-11	173
ABplapa	-86	-72	-67.5	-300	-58	933
ABplapaa	-27	-49	-53.5	-268	-119	112
ABplapaaa	-59	-57	-44.5	-74	3	-44
ABplapaaaa	-72	-48	-58	1	-89	-61
ABplapaaaaa				155		-8
ABplapaaaap				33		-115
ABplapaaaapa
ABplapaaaapp
ABplapaaap	-37	-86	-30.5	60	-122	-80
ABplapaaapa				-330		-109
ABplapaaapad
ABplapaaapav
ABplapaaapp				-13		-117
ABplapaap	-37	5	10.5	-71	-17	-48
ABplapaapa	54	-98	-10	-61	-54	-64
ABplapaapp	-32	-95	57	-27	3	-73
ABplapap	-50	-90	-56	-216	-86	46
ABplapapa	3	-63	-53	-84	-82	-63
ABplapapaa	2	-117	-16	72	-204	-58
ABplapapaaa
ABplapapaap
ABplapapap	-82	-64	-12.5	35	-56	-59
ABplapapp	-55	-33	-18	-6	-40	-52
ABplapappa	-25	-72	-3.5	-16	-46	-44
ABplapappp	-78	-84	-47	31	-35	-65
ABplapapppa				177		-21
ABplapapppp				-55		-102
ABplapappppa
ABplapappppaa
ABplapappppap
ABplapappppp
ABplapp	-43	-118	-51	-257	-67	441
ABplappa	-52	-118	-51.5	-234	-24	78
ABplappaa	-38	-105	-28.5	-63	-22	-139
ABplappaaa	-49	-101	-83.5	-61	-7	-132
ABplappaap	-50	-57	-47.5	-69	-50	-92
ABplappap	-37	-133	-55.5	-134	-63	-93
ABplappapa	-42	-76	-16.5	-6	-25	-97
ABplappapp	-60	-49	-54	-19	2	-78
ABplappp	-58	-70	-63.5	-90	-21	204
ABplapppa	-9	-193	-25	-78	-98	-134
ABplapppaa	-6	61	28	-52	-45	-91
ABplapppaaa				-136		-117
ABplapppaap				63		-40
ABplapppap	-23	-122	-19	-432	-141	-76
ABplapppapa				-469		8
ABplapppapp				-1039		-45
ABplapppappa
ABplapppappp
ABplapppp	-43	-48	2.5	-107	-86	-34
ABplappppa	-33	-53	31	-415	-83	-12
ABplappppp	-34	-65	-20.5	-297	-29	-59
ABplp	-59	-173	-74.5	-455	-110	-120
ABplpa	-45	-205	-28	-505	-142	209
ABplpaa	26	-146	-56.5	-217	-20	1120
ABplpaaa	559	451	-37.5	1354	-96	547
ABplpaaaa	465	1317	-54	4887	-105	-71
ABplpaaaaa	335	1002	-39	9978	1733	-108
ABplpaaaaaa		396		10485	10806	-105
ABplpaaaaap		365		8997	10883	-104
ABplpaaaap	314	1032	-45	6853	1388	-95
ABplpaaaapa		166		5025	8576	-74
ABplpaaaapp		254		4271	8790	-4
ABplpaaap	580	1301	-40.5	5006	-50	-165
ABplpaaapa	210	820	-99	9917	-177	-41
ABplpaaapaa		256		10217	-1892	-133
ABplpaaapap		380		9609	-1119	82
ABplpaaapp	314	866	46	7805	-53	-48
ABplpaaappa		338		7385	-1552	-35
ABplpaaappaa
ABplpaaappap
ABplpaaappp		197		6582	-572	-15
ABplpaap	269	367	-77	1293	-34	477
ABplpaapa	505	992	-23.5	5325	-57	-62
ABplpaapaa	291	847	-65.5	10194	-157	-53
ABplpaapaaa		257		11177		-144
ABplpaapaap		355		8605		-63
ABplpaapap	272	769	-6	9240	-16	-129
ABplpaapapa		417		8373		-6
ABplpaapapp		448		10380		32
ABplpaapp	436	948	-3.5	4848	-14	-79
ABplpaappa	292	609	15.5	8089	-103	-99
ABplpaappaa		214		7137		-47
ABplpaappap		208		8178		-82
ABplpaappp	280	625	17.5	8502	8	-97
ABplpaapppa		195		8384		-62
ABplpaapppp		215		6935		-86
ABplpaappppa
ABplpaappppp
ABplpap	70	-242	-32.5	-218	-105	1926
ABplpapa	522	465	-30.5	987	-87	609
ABplpapaa	427	1541	-86	3444	-159	-142
ABplpapaaa	217	976	-396	6385	-234	-55
ABplpapaaaa		225		6942		-92
ABplpapaaap		376		4424		25
ABplpapaap	265	621	-333.5	5587	-113	-117
ABplpapaapa		276		7415		-107
ABplpapaapp		213		7744		-155
ABplpapap	414	1450	-27	3528	-104	-79
ABplpapapa	211	4044	-34.5	4054	-79	-76
ABplpapapaa		3446		8918		-50
ABplpapapap		3416		8656		-259
ABplpapapp	206	3941	-11.5	2942	-196	-110
ABplpapappa		4774		6334		-107
ABplpapappp		4526		5338		-72
ABplpapp	614	552	-44.5	407	-70	554
ABplpappa	246	2853	-187.5	2409	-166	-144
ABplpappaa	136	5033	-245.5	4308	-218	-111
ABplpappaaa		2395		17547	844	-117
ABplpappaap		2027		4912	2032	-57
ABplpappap	48	2806	-107.5	2501	25	-35
ABplpappp	207	3179	-113	2315	-153	-164
ABplpapppa	154	6668	-119.5	6241	-157	-85
ABplpapppaa		3217		10846	-105	-71
ABplpapppap		2639		9270	-110	-4
ABplpapppp	124	7150	-89.5	7171	-189	-104
ABplpappppa		4410		9830	-119	-3
ABplpappppp		4297		11765	-229	12
ABplpp	-74	-165	-61	-439	-109	256
ABplppa	53	-47	-35	-184	-79	382
ABplppaa	386	964	-53	1750	-31	-41
ABplppaaa	339	1978	-32.5	7411	-91	-157
ABplppaaaa	266	1598	-38	9511	-102	-13
ABplppaaaaa	109	452		10650		-145
ABplppaaaap	125	626		8160		-55
ABplppaaaapa	66
ABplppaaaapp	-20
ABplppaaap	169	375	-27.5	23527	-23	-3
ABplppaap	361	2316	-21	6100	-127	-164
ABplppaapa	150	3933	-50	9000	5	-84
ABplppaapaa	12	2164		18541		-26
ABplppaapap	58	3360		13356		-47
ABplppaapp	105	4263	-53	6079	-66	-37
ABplppaappa	40	5803		7855		39
ABplppaappp	86	5668		8162		28
ABplppap	346	892	-23.5	1232	-41	70
ABplppapa	411	1807	-25	6522	-79	-195
ABplppapaa	320	1490	1.5	10522	-97	-11
ABplppapaaa	150	438		7651		1
ABplppapaaaa
ABplppapaaap
ABplppapaap	78	265		9448		-143
ABplppapap	255	1225	-110	11827	-67	-101
ABplppapapa	85	335		7420		-266
ABplppapapp	133	275		10634		-64
ABplppapp	413	1922	-36	6216	-87	-116
ABplppappa	210	1378	2.5	8951	-11	-81
ABplppappaa	67	571		6000		-114
ABplppappap	435	291		6092		-66
ABplppappp	186	1192	-86.5	10497	-12	-36
ABplppapppa	1050	563		5412		-95
ABplppapppp	885	283		8615		-113
ABplppp	65	-180	-52	-237	-99	896
ABplpppa	543	901	-3	1172	-79	249
ABplpppaa	365	3210	-7	6011	-112	-153
ABplpppaaa	133	3989	-24.5	11400	-50	-20
ABplpppaaaa	58	1756		10442		-11
ABplpppaaap	77	1488		15630		-28
ABplpppaap	187	3807	60	12590	39	-65
ABplpppaapa	64	1912		16219		-122
ABplpppaapaa
ABplpppaapap
ABplpppaapp	90	1561		24964		-6
ABplpppap	391	3263	5.5	6536	-23	-103
ABplpppapa	184	4278	-2.5	7891	-69	-73
ABplpppapaa	61	1704		13129		-90
ABplpppapap	119	1991		4840		-50
ABplpppapp	80	2542	-7.5	9711	-97	42
ABplpppp	364	812	-11.5	903	-71	296
ABplppppa	372	2677	-71	3661	-145	-171
ABplppppaa	137	3749	-100.5	8812	-88	-118
ABplppppaaa	291	1810		18935		-12
ABplppppaap	58	1657		17235		-110
ABplppppap	118	4116	-47	7674	-213	-110
ABplppppapa	11	2161		14136		-109
ABplppppapp	56	2351		13441		-74
ABplppppp	349	2927	-34	2381	-192	-117
ABplpppppa	88	2319	-37.5	8856	-210	24
ABplpppppaa	59	713		20810		1450
ABplpppppap	107	831		16731		1279
ABplpppppp	182	2440	-8.5	8035	-152	-112
ABplppppppa	80	1164		18402		6
ABplppppppp	63	1298		21472		-36
ABpr	-70	-137	-78.5	-296	-161	-192
ABpra	-64	-111	-79.5	-194	-180	-181
ABpraa	-95	-82	-83.5	-295	-156	448
ABpraaa	-98	-81	-56.5	-310	-107	1823
ABpraaaa	-32	-18	-3	-89	-229	375
ABpraaaaa	24	-77	-2.5	82	-89	-56
ABpraaaaaa	-17	41	-9.5	75	-149	5
ABpraaaaaaa				-44	-481	-109
ABpraaaaaap				173	725	59
ABpraaaaap	5	-15	-45.5	115	-185	-45
ABpraaaaapd				4	-1121	15
ABpraaaaapv				76	11	-46
ABpraaaap	-46	-53	-35	4	-76	-23
ABpraaaapa	-78	-23	17	-32	-54	-7
ABpraaaapad				-378	253	-47
ABpraaaapav				-908	908	-27
ABpraaaapp	23	-53	-19.5	-182	-144	-87
ABpraaaappa				21	-1004	-57
ABpraaaappp				54	-1126	-21
ABpraaaapppa
ABpraaaapppp
ABpraaap	-8	-14	-46	-115	-150	266
ABpraaapa	-44	-15	-28.5	31	-209	-96
ABpraaapaa	-5	-68	-23	53	432	-80
ABpraaapaad				-152	2855	-41
ABpraaapaav				1051	5524	-73
ABpraaapap	-96	4	-17	97	865	-98
ABpraaapapa				-100	7732	11
ABpraaapapaa
ABpraaapapap
ABpraaapapp				150	1523	-44
ABpraaapp	-41	-68	-19.5	-80	-111	-172
ABpraaappa	-28	-77	-36.5	-33	559	-100
ABpraaappaa				-208	8970	-91
ABpraaappap				-323	6093	-5
ABpraaappp	28		-31.5	-57	127	-107
ABpraaapppa				-106	3310	-116
ABpraaapppaa
ABpraaapppap
ABpraaapppp				-92	3374	-121
ABpraaappppa				-315
ABpraaappppp				-432
ABpraap	-97	-134	-42.5	-251	-180	1501
ABpraapa	-92	-51	-12.5	-106	-13	369
ABpraapaa	-31	-71	-25.5	56	-142	-79
ABpraapaaa	-34	37	-23.5	88	-193	-30
ABpraapaaaa	25			142		24
ABpraapaaap	29			53		-63
ABpraapaap	-39	-52	-105	55	-160	-51
ABpraapaapa	-4			104		-69
ABpraapaapp	-35			17		-72
ABpraapap	-29	-27	-52	24	-131	-96
ABpraapapa	403	-18	17.5	53	-129	-89
ABpraapapaa	338			-71		-125
ABpraapapap	316			-192		-33
ABpraapapp	328	5	-45.5	21	-88	-43
ABpraapappa	165			-15		-122
ABpraapappp	443			-70		-157
ABpraapapppa
ABpraapapppp
ABpraapp	-41	-87	-48	-191	-81	244
ABpraappa	-6	-77	-41.5	-47	-42	-115
ABpraappaa	48	-45	2.5	164	4	-19
ABpraappap	-92	69	-12	-418	-77	-61
ABpraappp	-32	-73	-18.5	-128	-60	-160
ABpraapppa	-13	-69	14.5	-310	-51	-58
ABpraapppp	2	-112	-46.5	-43	-58	-93
ABprap	-67	-84	-68	-394	-116	500
ABprapa	-45	-82	-52	-269	-115	1450
ABprapaa	-21	-63	-21	-100	20	239
ABprapaaa	-28	-36	-28	85	14	-99
ABprapaaaa	-17	-23	-37	172	-42	-52
ABprapaaaaa				137		-9
ABprapaaaap				104		-82
ABprapaaaapa
ABprapaaaapp
ABprapaaap	-29	-40	-59.5	35	-46	-47
ABprapaaapa				434		-67
ABprapaaapad
ABprapaaapav
ABprapaaapp				-120		-127
ABprapaap	-28	-76	-46.5	99	-29	-80
ABprapaapa	-47	63	-1.5	-71	96	-7
ABprapaapp	-85	-78	-51.5	30	40	-50
ABprapap	-23	-63	-58	-64	8	211
ABprapapa	-21	-17	-23.5	142	-1	-13
ABprapapaa	-48	23	-50.5	87	-57	-83
ABprapapaaa
ABprapapaap
ABprapapap	-62	-48	-16.5	113	46	-82
ABprapapp	-64	-84	-20.5	27	41	-85
ABprapappa	-34	-57	-4.5	93	26	-56
ABprapappp	-47	-76	-26	110	61	-53
ABprapapppa				43		-44
ABprapapppp				63		-16
ABprapappppa
ABprapappppaa
ABprapappppap
ABprapappppp
ABprapp	-81	-65	-58.5	-242	-26	1503
ABprappa	-49	-103	-47.5	-86	19	398
ABprappaa	-36	-70	-14	-23	30	-92
ABprappaaa	-26	-98	-30.5	15	182	-91
ABprappaap	-85	-57	49	-36	-2	-45
ABprappap	-78	-84	-65	29	-12	-100
ABprappapa	-28	-98	-19.5	33	42	-58
ABprappapp	-66	-37	-52.5	65	70	-64
ABprappp	-40	-76	-63.5	-62	54	421
ABprapppa	-1	-101	8.5	1	73	-34
ABprapppaa	35	-115	-41.5	69	63	-90
ABprapppaaa				-59		-6
ABprapppaap				-169		-19
ABprapppap	-7	-127	-23.5	-472	34	-47
ABprapppapa				-568		76
ABprapppapp				-949		27
ABprapppappa
ABprapppappp
ABprapppp	-34	-84	-51.5	-52	78	-45
ABprappppa	9	-50	19	-440	84	-32
ABprappppp	-83	-137	-12	-575	85	-85
ABprp	-119	-284	-89	-181	-209	-232
ABprpa	-121	-228	-92	-159	-229	429
ABprpaa	140	-117	-47	-71	-207	2106
ABprpaaa	563	203	-29.5	1409	-110	646
ABprpaaaa	345	924	-10	6040	-177	-121
ABprpaaaaa	160	936	-8	12368	1474	-75
ABprpaaaaaa		320		14878	11488	-5
ABprpaaaaap		328		12531	9677	-113
ABprpaaaap	185	989	-86	8566	1128	-71
ABprpaaaapa		233		4354	8816	-25
ABprpaaaapp		336		3812	9838	-148
ABprpaaap	385	731	-12.5	6136	-38	-26
ABprpaaapa	142	717	-40	11934	20	-9
ABprpaaapaa		201		14293	-565	-21
ABprpaaapap		335		11340	-571	79
ABprpaaapp	327	765	12.5	8708	-82	-52
ABprpaaappa		259		8154	-205	23
ABprpaaappaa
ABprpaaappap
ABprpaaappp		235		8165	354	24
ABprpaap	495	167	-35	1117	-157	543
ABprpaapa	404	721	-48	6152	-105	-69
ABprpaapaa	196	674	-9	12326	-95	-42
ABprpaapaaa		303		11929		68
ABprpaapaap		347		10341		-63
ABprpaapap	159	706	34.5	10924	-56	-79
ABprpaapapa		265		10065		14
ABprpaapapp		243		10780		-35
ABprpaapp	324	739	-43	5340	-118	-109
ABprpaappa	251	506	-24	10242	-81	-95
ABprpaappaa		226		8503		-198
ABprpaappap		233		10763		-52
ABprpaappp	235	615	1.5	9230	-37	-79
ABprpaapppa		341		10079		-58
ABprpaapppp		318		6332		-93
ABprpaappppa
ABprpaappppp
ABprpap	73	-155	-71	-94	-198	1894
ABprpapa	365	356	-42	802	-153	536
ABprpapaa	339	1320	-50.5	3396	-160	-39
ABprpapaaa	178	1216	-105	4758	-120	-70
ABprpapaaaa		555		5289		-17
ABprpapaaap		271		4311		-246
ABprpapaap	175	1075	-117	4101	-114	-68
ABprpapaapa		421		5206		-19
ABprpapaapp		286		4736		-93
ABprpapap	293	1329	-59.5	2685	-198	-83
ABprpapapa	151	3409	-27	3617	-217	-116
ABprpapapaa		2530		7777		-45
ABprpapapap		2911		6332		-105
ABprpapapp	177	3836	-102	2799	-129	-83
ABprpapappa		3913		4644		-21
ABprpapappp		3825		3668		-67
ABprpapp	402	328	-62	523	-150	672
ABprpappa	256	2414	-96	2337	-162	-108
ABprpappaa	71	3710	-46.5	5455	-134	-56
ABprpappaaa		1797		13675		-91
ABprpappaap		1963		11369		-98
ABprpappap	133	3684	-186.5	5179	-181	-74
ABprpappapa		3254		10972		-21
ABprpappapp		3329		6757		-39
ABprpappp	205	2439	-128	2143	-192	-33
ABprpapppa	91	6383	-101	6062	-155	-83
ABprpapppaa		3778		21379		-77
ABprpapppap		4251		16573		-111
ABprpapppp	156	6023	-78.5	6088	-253	-100
ABprpappppa		4714		17875		-79
ABprpappppp		4840		17683		-80
ABprpp	-74	-148	-63	-242	-158	570
ABprppa	99	-72	-49	-191	-42	2266
ABprppaa	574	525	-33	1848	-102	451
ABprppaaa	387	1218	3	6679	-52	-119
ABprppaaaa	256	1122	-54.5	6847	-79	-82
ABprppaaaaa	86	352		8398		-158
ABprppaaaap	203	524		5834		-86
ABprppaaaapa
ABprppaaaapp
ABprppaaap	66	302	34.5	14034	-125	141
ABprppaap	386	1378	-27	4603	-80	-121
ABprppaapa	90	3156	-172	7128	-131	-78
ABprppaapaa	94	3449		11624		-4
ABprppaapap	83	2941		8681		-32
ABprppaapp	207	3968	-56	5503	-151	-15
ABprppaappa	-22	4292		1268		-106
ABprppaappp	-42	4973		1992		-171
ABprppap	418	508	-46	1499	-118	442
ABprppapa	325	1518	-82	5888	-148	-91
ABprppapaa	231	1576	-67.5	7131	-84	-28
ABprppapaaa	80	565		5232		-15
ABprppapaaaa
ABprppapaaap
ABprppapaap	100	431		6406		74
ABprppapap	200	1164	-81.5	9279	-26	-60
ABprppapapa	43	511		6855		-16
ABprppapapp	26	392		11115		-31
ABprppapp	377	1467	-50	5902	-127	-119
ABprppappa	175	1274	-115	7576	-186	-30
ABprppappaa	83	393		4180		-74
ABprppappap	270	390		3711		-27
ABprppappp	191	1166	-1	8880	-85	-62
ABprppapppa	600	438		3161		85
ABprppapppp	805	604		5978		-127
ABprppp	125	-83	-79	-184	-155	2299
ABprpppa	449	826	9.5	1623	-92	415
ABprpppaa	275	3498	-30.5	5766	-63	-111
ABprpppaaa	107	3995	-10	10706	-21	-24
ABprpppaaaa	35	1831		8204		-74
ABprpppaaaaa
ABprpppaaap	17	1491		13368		-28
ABprpppaap	94	3960	19.5	14432	-39	-69
ABprpppaapa	80	2012		15038		-93
ABprpppaapaa
ABprpppaapap
ABprpppaapp	29	2007		25554		42
ABprpppap	292	3790	-29.5	5494	-136	-111
ABprpppapa	104	4525	-72	9943	-132	-100
ABprpppapaa	42	1526		10696		-144
ABprpppapap	29	2272		5439		-47
ABprpppapp	134	1839	-8.5	12258	-53	89
ABprpppp	505	957	-65	1088	-108	583
ABprppppa	231	3427	-83	3409	-169	-79
ABprppppaa	68	5741	-103.5	8559	-172	-135
ABprppppaaa	121	2886		11310		-15
ABprppppaap	32	3060		8906		-25
ABprppppap	94	5492	-76.5	7848	-184	-55
ABprppppapa	12	3714		10275		-5
ABprppppapp	43	3694		8310		-145
ABprppppp	325	3840	-48.5	2405	-129	-100
ABprpppppa	109	3853	-19.5	10697	-99	-125
ABprpppppaa	36	1344		14704		-63
ABprpppppap	18	1238		11979		-13
ABprpppppp	166	3955	-3	8593	-126	-40
ABprppppppa	-3	1284		17809		-5
ABprppppppp	65	2091		20987		-105
P1
EMS	-71		-89	-461	-152	-238
MS	-143	-258	-110.5	-199	-249	-270
MSa	-148	-300	-120.5	-275	-261	69
MSaa	-157	-287	-139.5	-164	-334	1557
MSaaa	-101	-54	-92	-39	-442	903
MSaaaa	-65	199	44	731	-336	-124
MSaaaaa	-56	211	375.5	1256	-422	-214
MSaaaaaa	1061	36	420.5	1466	-402	-99
MSaaaaaal	2690	25
MSaaaaaar	2889	-117
MSaaaaap	-74	-4	463	928	-131	-185
MSaaaaapa	-56	-78		675		-150
MSaaaaapaa
MSaaaaapap
MSaaaaapp	-67	-31		807		-183
MSaaaap	-77	34	422.5	1010	-272	-133
MSaaaapa	-90	6	482.5	1071	2	-77
MSaaaapaa	-16	-75		1175		-177
MSaaaapap	-47	-66		608		-48
MSaaaapp	-26	-78	494	1174	-267	-82
MSaaaappa	-4	-27		1661		-117
MSaaaappp	-31	-135		651		-18
MSaaap	-99	227	39	594	-271	-172
MSaaapa	-93	617	243.5	976	-119	-129
MSaaapaa	-20	1424	335.5	1863	-141	-135
MSaaapaaa		861		2643		-99
MSaaapaap		466		2954		-163
MSaaapap	-20	1056	285	2023	-118	-147
MSaaapapa		748		2658		-128
MSaaapapp		508		2583		-90
MSaaapp	-60	1073	257	1856	-136	-88
MSaaappa		2008	180	5120	-258	-93
MSaaappp		2399	-244	3041	-137	-84
MSaap	-156	-35	-91.5	35	-308	897
MSaapa	-80	949	281.5	348	-223	-114
MSaapaa	-100	1841	758.5	1858	-208	-135
MSaapaaa	-5	1595	604.5	8707	-165	-32
MSaapaaaa		393		10341		33
MSaapaaap		388		9402		-47
MSaapaap	-166	1182	390	6703	-87	-93
MSaapaapa		427		8566		-58
MSaapaapaa		201
MSaapaapap		-18
MSaapaapp		362		8529		-42
MSaapap	-93	1806	539	2120	-218	-108
MSaapapa	-50	431	227.5	11859	-122	-124
MSaapapaa		33
MSaapapap		65
MSaapapp	-10	656	393	5845	-173	-102
MSaapappa		-56		7389		-182
MSaapappp		-26		8815		-121
MSaapp	-87	1103	383.5	493	-165	-131
MSaappa	-63	2204	405	3614	-199	-108
MSaappaa		669		11257		-54
MSaappap		685		8693		-137
MSaappp	-88	2227	671.5	2939	-175	-115
MSaapppa		867		6284	297	-112
MSaapppaa		281
MSaapppap		163
MSaapppp		837		8237	-315	-169
MSaappppa		-83
MSaappppp		196
MSap	-126	-235	-64.5	-191	-262	1328
MSapa	-64	-101	-66.5	10	-197	676
MSapaa	-24	-9	-89.5	688	-153	-80
MSapaaa	-75	-78	-174	911	-312	-156
MSapaaaa	1359	-104	-149	634	-350	-130
MSapaaaad	1862	-280
MSapaaaav	2097	-40
MSapaaap	661	-62	6.5	637	-240	-138
MSapaap	-77	-151	-197.5	909	-232	-87
MSapaapa	-40	-39		776		-5
MSapaapp	-102	-297		-38		-115
MSapap	-85	-91	-69	518	-164	-112
MSapapa	-56	-96	-138	847	-128	-148
MSapapaa	-94	-144	-89	712	-206	-101
MSapapaaa
MSapapaap
MSapapap		-88	-87	242	-19	-88
MSapapp	-72	-89	-28	715	-81	-98
MSapappa	-18	-79	-186	703	-163	-111
MSapappp	75	-68	-93	569	-57	-75
MSapp	-117	-157	-59.5	73	-136	820
MSappa	-72	-59	-105	611	-135	-122
MSappaa	-25	-75	-190	849	-116	-99
MSappaaa		-101		657	-123	-169
MSappaap		-84		436	-267	-247
MSappap	-97	-134	-213	791	-146	-107
MSappapa		-85		942		-96
MSappapp		-105		241		-173
MSappp	-59	-39	-48	581	-120	-150
MSapppa	-90	-97	-79	850	-180	-101
MSapppaa		-61		557		-9
MSapppap		-86		925		-120
MSapppp	-26	-48	-67.5	719	-56	-86
MSappppa		-40		638		-69
MSappppp		-6		780		-107
MSp	-139	-235	-86	-140	-226	69
MSpa	-118	-336	-106.5	-165	-328	1276
MSpaa	-99	35	-109.5	-48	-256	685
MSpaaa	-63	170	-63	307	-243	-145
MSpaaaa	-8	149	-157	556	-278	-128
MSpaaaaa	-47	47	-121.5	620	-294	-119
MSpaaaaaa		-21		305		-172
MSpaaaaap		-53		495		-238
MSpaaaap	-101	-3	-204	354	-192	-108
MSpaaaapa		180		171		-89
MSpaaaapp		112		254		-94
MSpaaap	-78	46	-51	482	-236	-81
MSpaaapa	-71	-9	-205.5	496	-169	-87
MSpaaapaa		-1		241		33
MSpaaapap		-101		96		-51
MSpaaapp	-73	8	-129.5	450	-163	-60
MSpaaappa		-20		416		-131
MSpaaappp		-12		266		-38
MSpaap	-69	140	-84.5	305	-233	-150
MSpaapa	-73	593	-109.5	495	-183	-173
MSpaapaa	-38	908	-141.5	703	-143	-100
MSpaapaaa		658		492		-80
MSpaapaap		695		376		31
MSpaapap	-58	1098	-59.5	305	-31	-120
MSpaapapa		619		320		-177
MSpaapapp		459		140		-2
MSpaapp	-35	117	-138	774	-25	-82
MSpap	-155	-185	-107.5	-111	-338	581
MSpapa	-153	659	255	172	-266	-201
MSpapaa	-83	1325	785.5	1702	-274	-175
MSpapaaa	-91	855	423	7574	-196	-116
MSpapaaaa		268		11305		-89
MSpapaaap		251		9580		-140
MSpapaap	-96	712	610	5822	-190	-102
MSpapaapa		239		9816		-144
MSpapaapaa
MSpapaapap
MSpapaapp		191		7611		-64
MSpapap	-57	1238	525	1519	-208	-145
MSpapapa	-8	400	438.5	11530	-387	-90
MSpapapaa		-33
MSpapapap		118
MSpapapp	-93	500	578	5406	-229	-135
MSpapappa		-130		7370		-106
MSpapappp		-145		11334		-146
MSpapp	-118	977	393	316	-265	-140
MSpappa	-37	933	481	3031	-196	-74
MSpappaa		239		10434		-67
MSpappap		234		7954		-81
MSpappp	-84	1295	946.5	2213	-195	-112
MSpapppa		408		6443		-117
MSpapppaa		84
MSpapppap		181
MSpapppp		326		6209		-117
MSpappppa		139
MSpappppp		14
MSpp	-86	-279	-86.5	-110	-327	1197
MSppa	-103	-147	-72	-5	-230	455
MSppaa	-35	-190	-40	224	-222	-167
MSppaaa	-41	-102	-47	446	-228	-166
MSppaaaa	917	-69	-94	438	-68	-56
MSppaaaad	1319	-3
MSppaaaav	759	35
MSppaaap	634	-129	88	366	-195	-134
MSppaap	-19	-138	-47.5	242	-159	-110
MSppaapa	-2	-122		357	-111	107
MSppaapp	-53	-315		-494	-148	313
MSppap	-99	-114	-70.5	204	-117	-146
MSppapa	-59	-140	-61	275	-140	-108
MSppapaa	-125	-106	-35	162	-149	-77
MSppapaaa
MSppapaap
MSppapap	-90	-168	-132	-272	-184	-60
MSppapp	-51	-124	-38	321	-82	-84
MSppappa	-61	-69	52	300	-81	-97
MSppappp	25	-47	-113	351	-88	-97
MSppp	-131	-233	-53.5	-89	-274	538
MSpppa	-38	-95	-119	204	-171	-113
MSpppaa	-61	-128	-196	168	-121	-121
MSpppaaa	-69	-87		95		-117
MSpppaap	-51	-173		-102		-115
MSpppap	-56	-193	-154.5	76	-174	-69
MSpppapa		-187		318		6
MSpppapp		-212		-198		-143
MSpppp	-72	-127	-56.5	194	-152	-99
MSppppa	-51	-115	-65	219	-120	-76
MSppppaa	-134	-33		-12	340	-60
MSppppap	-161	-123		269	-327	-122
MSppppp	-48	-116	-53	369	-85	-86
MSpppppa	65	-16		447		-101
MSpppppp	-78	-88		279		-21
E	-141	-275	-115.5	-355	-212	-285
Ea	-117	-344	-101	-236	-262	675
Eal	-83	-227	-73.5	-259	-207	279
Eala	-74	-154	-61	-211	-173	-73
Ealaa	-15	-161	-69	-284	-59	-99
Ealaad
Ealaav
Ealap	-59	-35	-45.5	-141	-82	-107
Ealapa
Ealapp
Ealp	-52	-122	-77.5	-199	-134	-90
Ealpa	-113	-201	-120	-513	-100	-152
Ealpp	-45	-137	-77.5	-155	-193	-70
Ealppa
Ealppp
Ear	-91	-216	-74	-239	-171	198
Eara	-71	-121	-84.5	-220	-178	-133
Earaa	-24	-115	-141.5	-389	-155	-91
Earaad						5
Earaav						-220
Earap	-91	-93	-75	-222	-137	-96
Earapa						270
Earapp						-71
Earp	-43	-137	-82	-199	-149	-144
Earpa	-26	-151	-226.5	-363	-176	-127
Earpp	-89	-122	-102	-128	-67	-83
Earppa
Earppp
Ep	-123	-239	-108.5	-304	-218	708
Epl	-62	-180	-67.5	-280	-101	162
Epla	-36	-131	-36	-189	-70	-70
Eplaa	-28	-81	-74	-133	-56	-55
Eplaaa
Eplaap
Eplap	-51	-82	-63.5	-183	-125	-135
Eplapa
Eplapp
Eplp	-39	-147	-55	-224	-118	-135
Eplpa	-32	-34	-56	-396	-97	-118
Eplpaa
Eplpap
Eplpp	-58	-295	-40.5	-667	-117	-155
Eplppa
Eplppaa
Eplppap
Eplppp
Eplpppa
Eplpppp
Epr	-84	-144	-95	-272	-156	331
Epra	-51	-79	-45	-175	-128	-127
Epraa	-18	-133	-100.5	-125	-12	-33
Epraaa
Epraap
Eprap	-4	-6	-44	-160	-159	-71
Eprapa
Eprapp
Eprp	-85	-113	-71	-196	-118	-129
Eprpa	-99	-154	-50	-173	-177	-76
Eprpaa
Eprpap
Eprpp	-112	-236	-38.5	-197	-156	-135
Eprppa
Eprppaa
Eprppap
Eprppp
Eprpppa
Eprpppp
P2	-92		-87.5	-668	-103	-251
C	-81	-105	-81.5	-422	-28	-121
Ca	-34	-65	-74	-344	-53	-70
Caa	-70	-30	-83.5	-419	-61	116
Caaa	-61	-58	-76	-275	-22	-26
Caaaa	-53	-34	-76.5	-280	-67	-65
Caaaaa	-10	-18	-39.5	-166	-25	-41
Caaaap	5	-13	-37.5	-155	-15	-64
Caaap	-31	-83	-79	-240	-48	-106
Caaapa	-26	-81	-59	-159	-95	-48
Caaapp	-79	-78	-28	-122	-59	-62
Caap	-34	-84	-73	-341	-29	-9
Caapa	-18	-73	-30.5	-236	-100	-142
Caapaa				-1507		-133
Caapap				333		-61
Caapp	-69	-94	-30	-209	-57	-234
Caappd	-15	-158	-15.5	-175	-96	-127
Caappv	-81	-76	-40	-42	-120	-94
Cap	-42	-112	-79.5	-420	-40	169
Capa	-32	-158	-58	-247	-35	21
Capaa	-64	-266	-135	-150	-141	-126
Capaaa	-48	-261	19.5	-170	4	-87
Capaaaa				-204		-188
Capaaap				-109		1
Capaap	-31	-251	-71.5	-330	-141	-13
Capaapa				-179		-212
Capaapp				-385		4
Capap	-84	-181	-51	-176	-140	-101
Capapa	-139	50	-34	-159	-106	-80
Capapaa				-191		-44
Capapap				-124		70
Capapp	-57	-288	-58	-818	-138	-35
Capappa				-3612		-254
Capappp				-417		23
Capp	-66	-126	-59	-297	-91	135
Cappa	-75	-175	-32	-156	-85	-159
Cappaa	-108	-81	-65	-113	-70	-115
Cappaaa				-16		-85
Cappaap				-45		-71
Cappap	23	9	-23.5	-113	-44	-151
Cappapa				-47		-142
Cappapp				-201		-145
Cappp	-62	-110	2.5	-121	-97	-203
Capppa	-76	-60	11.5	-144	-60	-119
Capppaa				-159		-19
Capppap				-258		-135
Capppp	15	-124	-37	-482	-142	-93
Cappppd				-334		-167
Cappppv				-2721		-129
Cp	-52	-88	-97.5	-519	-83	-121
Cpa	-43	-71	-63.5	-481	-80	264
Cpaa	-44	-76	-51.5	-422	-42	-54
Cpaaa	-56	-12	-67.5	-278	-28	-18
Cpaaaa	-40	-28	-41.5	-185	-46	-41
Cpaaap	-63	-3	-42.5	-200	-26	-64
Cpaap	-27	-71	-55.5	-191	-79	-106
Cpaapa	-56	10	-27.5	-138	-68	-36
Cpaapp	-11	-56	-37.5	-101	-106	-61
Cpap	-65	-117	-44.5	-378	-43	-40
Cpapa	-76	-72	-35	-190	-54	-158
Cpapaa	-66	-112	-17	-108	-112	-132
Cpapap	-47	-120	-92	-132	-178	-105
Cpapp	-68	-115	-18	-246	-87	-185
Cpappd	-46	-87	-27.5	-172	-135	-95
Cpappv	-75	-266	16.5	-495	-107	-173
Cpp	-76	-84	-59	-451	-90	423
Cppa	-36	-88	-49	-358	-52	26
Cppaa	-72	-211	-114	-145	-177	-109
Cppaaa	-56	-117	-75.5	-192	-68	-50
Cppaaaa				-201		-91
Cppaaap				-464		-40
Cppaap	-53	-159	-99	-251	-87	-116
Cppaapa				107		-241
Cppaapp				-30		-13
Cppap	-22	-189	-62.5	-199	-133	-153
Cppapa	-52	-173	-21	-112	-14	-111
Cppapaa				-99		-69
Cppapap				75		-92
Cppapp	-86	-217	-52	-773	-98	-93
Cppappa						207
Cppappp						-220
Cppp	-24	-147	-73.5	-346	-64	109
Cpppa	-24	-132	-40	-181	-119	-161
Cpppaa	-67	-143	-37.5	-144	-87	-92
Cpppaaa				-72		-68
Cpppaap				-56		-117
Cpppap	-62	-105	-69	-169	-109	-142
Cpppapa				-187		-135
Cpppapp				-187		-114
Cpppp	-60	-144	-54	-179	-128	-122
Cppppa	-24	-184	-7	-128	-72	-96
Cppppaa				-21		-121
Cppppap				-56		-125
Cppppp	-9	-203	-53	-243	-112	-78
Cpppppd				-180		-98
Cpppppv				-1854		-59
P3	-86	-197	-87	-565	-159	-271
D	-84	-238	-79.5	-643	-205	-262
Da	-95	-271	-72	-485	-208	562
Daa	-51	-317	-43.5	-98	-89	-143
Daaa	-68	-122	-50	-127	-120	-100
Daaaa				-404		-109
Daaap				-123		-84
Daap	-34	-204	-15	-204	-97	-122
Daapa				-476		-76
Daapp				-232		-166
Dap	-97	-239	-33	-177	-242	-39
Dapa	-53	-154	-45.5	-144	-130	-104
Dapaa				-148		-92
Dapap				-129		-59
Dapp	-47	-102	-69.5	-150	-95	-92
Dappa	169			-153		-60
Dappaa
Dappap
Dappp	253			-135		-36
Dapppa
Dapppp
Dp	-116	-288	-70	-381	-286	538
Dpa	-82	-246	-92	-143	-197	-49
Dpaa	-65	-193	-78	-179	-147	-80
Dpaaa				-438		-153
Dpaap				-171		-78
Dpap	-33	-267	-182	-165	-203	-115
Dpapa				-466		-82
Dpapp				-425		-90
Dpp	-45	-202	-70.5	-263	-167	-98
Dppa	-89	-159	-19.5	-141	-120	-95
Dppaa				-55		-111
Dppap				-72		-86
Dppp	-77	-116	-73.5	-79	-55	-103
Dpppa	-138			-114		-63
Dpppaa
Dpppap
Dpppp	-34			-142		-85
Dppppa
Dppppp
P4	-126	-333	-90	-324	-221	-279
Z2	-57	-234	-72.5	-138	-167	-145
Z3	-71	-265	-193	-143	-128	-181
